# Supplementary material for: Impact of Neoantigen Expression and T-Cell Activation on Breast Cancer Survival
Source: MDPI journal article supplement (doi:10.3390/cancers13122879), 2021-06-09
Supplement: s1 [file s1]

# Impact of Neoantigen Expression and T-Cell Activation on Breast Cancer Survival

Wenjing Li, Amei Amei, Francis Bui, Saba Norouzifar, Lingeng Lu and Zuoheng Wang

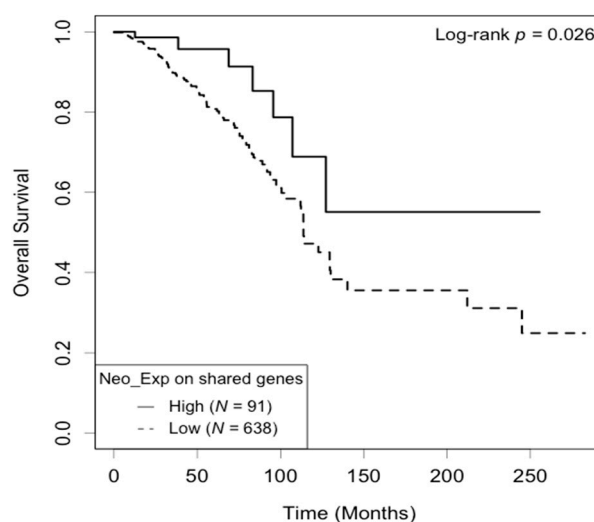

**Figure S1.** Kaplan-Meier survival curve of expression of the most shared neoantigens. Patients with a high level of neoantigen expression had better overall survival compared to those with a low level ( $p = 0.026$ ).

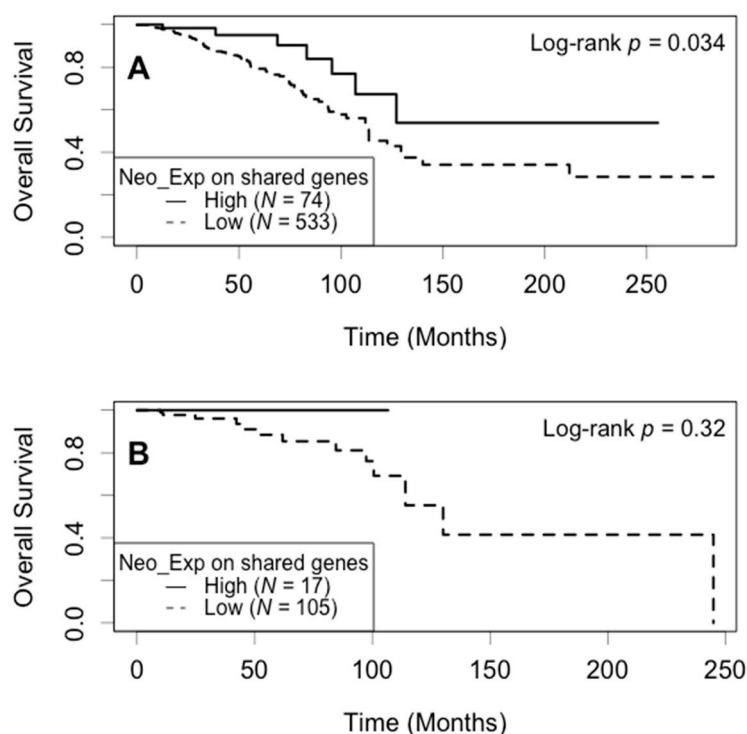

**Figure S2.** Kaplan-Meier survival curve of expression of the most shared neoantigens stratified by T cell activation status. (A) In the T cell exhaustion subgroup, patients with a high level of neoantigen expression had better overall survival compared to those with a low level ( $p = 0.034$ ); (B) In the T cell activation subgroup, there was no significant difference in survival between patients in the high and low levels of neoantigen expression ( $p = 0.32$ ).

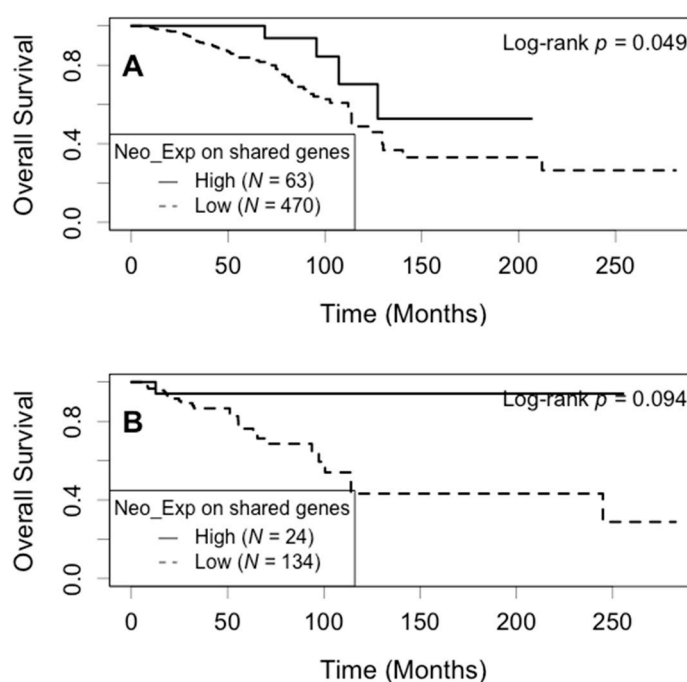

**Figure S3.** Kaplan-Meier survival curve of expression of the most shared neoantigens stratified by ER status. (A) In the ER positive subgroup, patients with a high level of neoantigen expression had better overall survival compared to those with a low level ( $p = 0.049$ ); (B) In the ER negative subgroup, there was no significant difference in survival between patients in the high and low levels of neoantigen expression ( $p = 0.094$ ).

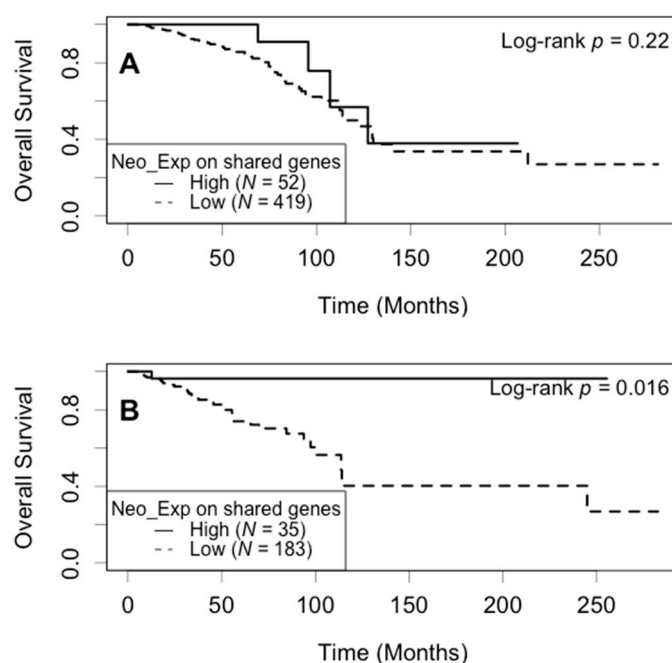

**Figure S4.** Kaplan-Meier survival curve of expression of the most shared neoantigens stratified by PR status. (A) In the PR positive subgroup, there was no significant difference in survival between patients in the high and low levels of neoantigen expression ( $p = 0.22$ ); (B) In the PR negative subgroup, patients with a high level of neoantigen expression had better overall survival compared to those with a low level ( $p = 0.016$ ).

**Table S1.** Correlation between neoantigen expression and clinical pathological variables.

| Variable          | Neoantigen Expression |            | <i>p</i> -Value |
|-------------------|-----------------------|------------|-----------------|
|                   | High N (%)            | Low N (%)  |                 |
| ER                |                       |            |                 |
| Positive          | 405 (76.0)            | 128 (24.0) | 0.016           |
| Negative          | 135 (85.4)            | 23 (14.6)  |                 |
| PR                |                       |            |                 |
| Positive          | 354 (75.2)            | 117 (24.8) | 0.006           |
| Negative          | 185 (84.9)            | 33 (15.1)  |                 |
| HER2              |                       |            |                 |
| Positive          | 101 (86.3)            | 16 (13.7)  | 0.073           |
| Negative          | 298 (78.2)            | 83 (21.8)  |                 |
| Molecular subtype |                       |            |                 |
| Luminal           | 304 (77.4)            | 89 (22.6)  | 0.004           |
| Basal-like        | 64 (90.1)             | 7 (9.9)    |                 |
| HER2-enrich       | 29 (93.5)             | 2 (6.5)    |                 |
| Stage             |                       |            |                 |
| I                 | 86 (68.8)             | 39 (31.2)  | 0.016           |
| II                | 328 (80.4)            | 80 (19.6)  |                 |
| III & IV          | 142 (80.7)            | 34 (19.3)  |                 |
| Histology         |                       |            |                 |
| Ductal            | 476 (78.8)            | 128 (11.2) | 0.259           |
| Lobular           | 49 (79.0)             | 13 (21.0)  |                 |
| Mix               | 29 (65.9)             | 15 (34.1)  |                 |
| Other             | 14 (77.8)             | 4 (22.2)   |                 |

**Table S2.** Correlation between neoantigen expression, mutation load, expression of the most shared neoantigens and DNA repair gene expression.

| Gene Name    | Correlation ( <i>p</i> -Value)  |                                   | Shared Neoantigen Expression |
|--------------|---------------------------------|-----------------------------------|------------------------------|
|              | Neoantigen Expression           | Mutation Load                     |                              |
| <i>APEX1</i> | 0.01 (1.000)                    | 0.06 (1.000)                      | −0.02 (1.000)                |
| <i>ATM</i>   | −0.07 (1.000)                   | −0.24 ( $7.03 \times 10^{-10}$ )  | −0.06 (1.000)                |
| <i>BLM</i>   | 0.26 ( $5.02 \times 10^{-11}$ ) | 0.36 ( $<5.28 \times 10^{-15}$ )  | 0.12 (0.026)                 |
| <i>BRCA1</i> | 0.06 (1.000)                    | 0.04 (1.000)                      | 0.03 (1.000)                 |
| <i>BRCA2</i> | 0.16 ( $3.45 \times 10^{-4}$ )  | 0.21 ( $4.98 \times 10^{-7}$ )    | 0.01 (1.000)                 |
| <i>CHEK1</i> | 0.20 ( $9.98 \times 10^{-7}$ )  | 0.32 ( $<5.28 \times 10^{-15}$ )  | 0.08 (0.542)                 |
| <i>CHEK2</i> | 0.24 ( $1.68 \times 10^{-9}$ )  | 0.33 ( $<5.28 \times 10^{-15}$ )  | 0.12 (0.024)                 |
| <i>ERCC1</i> | −0.14 ( $4.95 \times 10^{-3}$ ) | −0.16 ( $1.99 \times 10^{-4}$ )   | −0.08 (0.600)                |
| <i>ERCC4</i> | 0.04 (1.000)                    | −0.08 (0.775)                     | 0.01 (1.000)                 |
| <i>ERCC6</i> | −0.02 (1.000)                   | −0.08 (0.614)                     | −0.02 (1.000)                |
| <i>FANCG</i> | 0.06 (1.000)                    | 0.20 ( $1.67 \times 10^{-6}$ )    | 0.06 (1.000)                 |
| <i>MLH1</i>  | −0.01 (1.000)                   | −0.14 ( $2.28 \times 10^{-3}$ )   | −0.01 (1.000)                |
| <i>MSH2</i>  | 0.17 ( $9.83 \times 10^{-5}$ )  | 0.22 ( $2.79 \times 10^{-8}$ )    | 0.05 (1.000)                 |
| <i>MSH3</i>  | −0.10 (0.240)                   | −0.24 ( $6.66 \times 10^{-10}$ )  | −0.06 (1.000)                |
| <i>MUTYH</i> | 0.03 (1.000)                    | 0.10 (0.159)                      | 0.00 (1.000)                 |
| <i>OGG1</i>  | 0.00 (1.000)                    | −0.05 (1.000)                     | 0.02 (1.000)                 |
| <i>RAD51</i> | 0.23 ( $9.46 \times 10^{-9}$ )  | 0.36 ( $<5.28 \times 10^{-15}$ )  | 0.09 (0.498)                 |
| <i>RPAP1</i> | −0.05 (1.000)                   | −0.12 (0.037)                     | −0.01 (1.000)                |
| <i>XPA</i>   | −0.18 ( $1.19 \times 10^{-5}$ ) | −0.32 ( $<5.28 \times 10^{-15}$ ) | −0.06 (1.000)                |
| <i>XPC</i>   | −0.17 ( $7.58 \times 10^{-5}$ ) | −0.35 ( $<5.28 \times 10^{-15}$ ) | −0.12 (0.025)                |
| <i>XRCC1</i> | −0.08 (0.840)                   | −0.10 (0.241)                     | −0.07 (1.000)                |
| <i>XRCC2</i> | 0.19 ( $5.18 \times 10^{-6}$ )  | 0.30 ( $5.33 \times 10^{-15}$ )   | 0.11 (0.071)                 |
| <i>XRCC3</i> | 0.08 (0.998)                    | 0.16 ( $5.92 \times 10^{-4}$ )    | 0.03 (1.000)                 |

|       |              |               |               |
|-------|--------------|---------------|---------------|
| XRCC4 | 0.02 (1.000) | −0.06 (1.000) | −0.05 (1.000) |
|-------|--------------|---------------|---------------|

**Table S3.** Relationship between overall survival and expression of the most shared neoantigens.

| Variables                         | Death                     |         |
|-----------------------------------|---------------------------|---------|
|                                   | HR (95% CI <sup>1</sup> ) | p-Value |
| Most Shared Neoantigen Expression |                           |         |
| Low                               | 1.00                      |         |
| High                              | 0.30 (0.11–0.82)          | 0.019   |
| T Cell Activation                 |                           |         |
| Exhaustion                        | 1.00                      |         |
| Activation                        | 0.46 (0.23–0.92)          | 0.029   |
| Age                               | 1.04 (1.02–1.06)          | <0.001  |
| ER                                |                           |         |
| Negative                          | 1.00                      |         |
| Positive                          | 0.58 (0.36–0.94)          | 0.028   |
| Stage                             |                           |         |
| Stage I                           | 1.00                      |         |
| Stage II–IV                       | 2.78 (1.46–5.31)          | 0.002   |
| Histology                         |                           |         |
| Ductal                            | 1.00                      |         |
| Lobular                           | 0.81 (0.40–1.66)          | 0.568   |
| Mix or Other                      | 1.01 (0.53–1.94)          | 0.971   |

**Table S4.** Association between expression of the most shared neoantigens and overall survival stratified by ER status.

| Stratification | Variables         | Death                     |         |
|----------------|-------------------|---------------------------|---------|
|                |                   | HR (95% CI <sup>1</sup> ) | p-value |
| ER Positive    | Neo Expression    |                           |         |
|                | Low               | 1.00                      |         |
|                | High              | 0.28 (0.09–0.90)          | 0.033   |
|                | T Cell Activation |                           |         |
|                | Exhaustion        | 1.00                      |         |
|                | Activation        | 0.73 (0.31–1.73)          | 0.477   |
|                | Age               | 1.05 (1.03–1.07)          | <0.001  |
|                | Stage             |                           |         |
|                | Stage I           | 1.00                      |         |
|                | Stage II–IV       | 2.78 (1.36–5.69)          | 0.005   |
|                | Histology         |                           |         |
|                | Ductal            | 1.00                      |         |
|                | Lobular           | 0.53 (0.22–1.26)          | 0.153   |
|                | Mix or Other      | 1.15 (0.56–2.37)          | 0.703   |
| ER Negative    | Neo Expression    |                           |         |
|                | Low               | 1.00                      |         |
|                | High              | 0.43 (0.06–3.29)          | 0.413   |
|                | T Cell Activation |                           |         |
|                | Exhaustion        | 1.00                      |         |
|                | Activation        | 0.32 (0.11–0.99)          | 0.049   |
|                | Age               | 1.03 (1.00–1.06)          | 0.083   |
|                | Stage             |                           |         |
|                | Stage I           | 1.00                      |         |
|                | Stage II–IV       | 4.73 (0.62–35.95)         | 0.132   |
|                | Histology         |                           |         |
|                | Ductal            | 1.00                      |         |
|                | Lobular           | 4.73 (1.27–17.68)         | 0.021   |
|                | Mix or Other      | 0.66 (0.14–3.11)          | 0.603   |

<sup>1</sup> CI: confidence interval.**Table S5.** Association between expression of the most shared neoantigens and overall survival stratified by PR status.

| Stratification<br>Variable | Variables         | Death                     |         |
|----------------------------|-------------------|---------------------------|---------|
|                            |                   | HR (95% CI <sup>1</sup> ) | p-Value |
| PR Positive                | Neo Expression    |                           |         |
|                            | Low               | 1.00                      |         |
|                            | High              | 0.37 (0.11–1.21)          | 0.100   |
|                            | T Cell Activation |                           |         |
|                            | Exhaustion        | 1.00                      |         |
|                            | Activation        | 0.70 (0.24–1.98)          | 0.497   |
|                            | Age               | 1.05 (1.03–1.07)          | <0.001  |
|                            | ER                |                           |         |
|                            | Negative          | 1.00                      |         |
|                            | Positive          | 0.80 (0.11–5.97)          | 0.826   |
|                            | Stage             |                           |         |
|                            | Stage I           | 1.00                      |         |
|                            | Stage II–IV       | 2.64 (1.24–5.63)          | 0.012   |
|                            | Histology         |                           |         |
| PR Negative                | Ductal            | 1.00                      |         |
|                            | Lobular           | 0.55 (0.23–1.32)          | 0.179   |
|                            | Mix or Other      | 1.14 (0.53–2.48)          | 0.734   |
|                            | Neo Expression    |                           |         |
|                            | Low               | 1.00                      |         |
|                            | High              | 0.17 (0.02–1.25)          | 0.082   |
|                            | T Cell Activation |                           |         |
|                            | Exhaustion        | 1.00                      |         |
|                            | Activation        | 0.45 (0.17–1.16)          | 0.100   |
|                            | Age               | 1.02 (1.00–1.05)          | 0.083   |
|                            | ER                |                           |         |
|                            | Negative          | 1.00                      |         |
|                            | Positive          | 0.75 (0.34–1.66)          | 0.485   |
|                            | Stage             |                           |         |
|                            | Stage I           | 1.00                      |         |
|                            | Stage II–IV       | 3.68 (0.87–15.60)         | 0.078   |
|                            | Histology         |                           |         |
|                            | Ductal            | 1.00                      |         |
|                            | Lobular           | 3.50 (1.02–12.03)         | 0.047   |
|                            | Mix or Other      | 0.81 (0.23–2.82)          | 0.739   |

<sup>1</sup> CI: confidence interval.
